# Supplementary material for: RuIII-edta (edta4− = ethylenediaminetetraacetate) mediated photocatalytic conversion of bicarbonate to formate over visible light irradiated non-metal doped TiO2 semiconductor photocatalysts
Source: Royal Society of Chemistry journal article supplement (doi:10.1039/c6ra11464d), 2016-01-01
Supplement: c6ra11464d1.pdf [file c6ra11464d1.pdf]

**Ru<sup>III</sup>(edta)] (edta<sup>4-</sup> = ethylenediaminetetraacetate) mediates photocatalytic conversion of bicarbonate to formate over visible light irradiated non-metal doped TiO<sub>2</sub> semiconductor photocatalysts**

Tapas Mandol, Tapashree Mandol, Debabrata Chatterjee\*

**S1. Surface modification of TiO<sub>2</sub> semiconductor particles with [Ru<sup>III</sup>(edta)] catalyst complex**

Surface modification of TiO<sub>2</sub> semiconductor particles with [Ru<sup>III</sup>(edta)] catalyst complex was achieved by the following procedure. TiO<sub>2</sub> powder (500 mg) was added into an aqueous solution of [Ru<sup>III</sup>(edta)] complex (1.0 mM). The resulting solution was stirred magnetically for over 5 h, to allow the complex to adsorb onto the TiO<sub>2</sub>. The pH of the mixture was kept at 5.0 (by using 0.1M HCl / 0.1M NaOH). It was then filtered, washed twice with distilled water and dried at room temperature. The uptake of the [Ru<sup>III</sup>(edta)] complex by the surface of TiO<sub>2</sub> was estimated spectrophotometrically by measuring the difference in absorbance of free [Ru<sup>III</sup>(edta)] complex in aqueous solution with that of the supernatant liquid obtained after filtration, which was found to be 3.20 μmol/g. For C-TiO<sub>2</sub>, N-TiO<sub>2</sub> and S-TiO<sub>2</sub> samples, the values of [Ru<sup>III</sup>(edta)] uptake are 3.11 μmol/g, 3.17 μmol/g and 3.22 μmol/g, respectively.

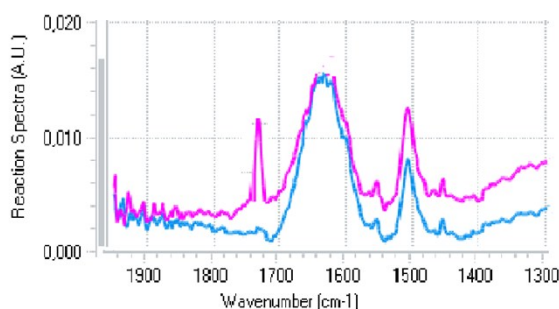

**Fig. S1** IR Spectra of (—) Ru(edta) complex and (—) Ru(edta) adsorbed in TiO<sub>2</sub> surface

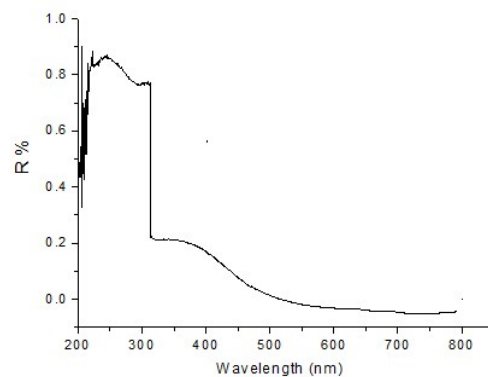

**Fig.S2** . Diffuse reflectance spectra of the catalyst sample collected (by filtration) after the completion of the catalytic reaction.

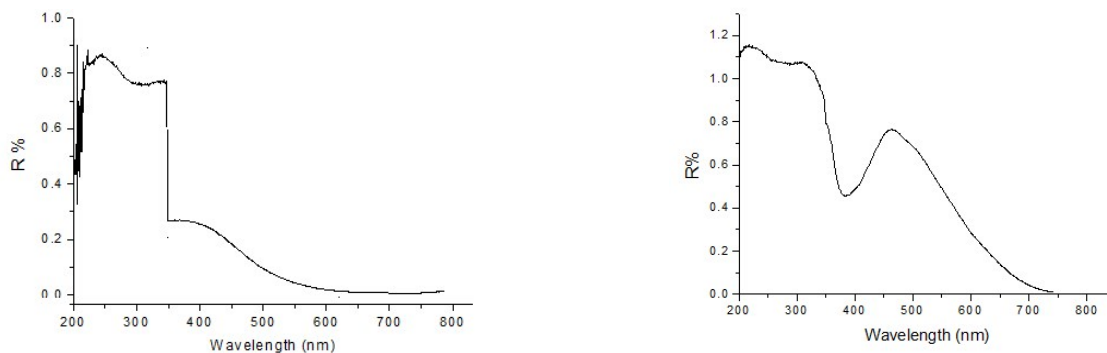

**Fig.S3** . Diffuse reflectance spectra of (a)  $[\text{Ru}^{\text{III}}(\text{edta})\text{pz}]$  surface adsorbed  $\text{TiO}_2$  and (b)  $[\text{Ru}^{\text{II}}(\text{edta})\text{pz}]$  surface adsorbed  $\text{TiO}_2$  semiconductor photocatalysts.
